# Supplementary material for: Reduction-Triggered Paclitaxel Release Nano-Hybrid System Based on Core-Crosslinked Polymer Dots with a pH-Responsive Shell-Cleavable Colorimetric Biosensor
Source: PubMed Central journal article supplement (PMC6862247; doi:10.3390/ijms20215368), 2019-10-28
Supplement: ijms-20-05368-s001.pdf [file ijms-20-05368-s001.pdf]

# Supplementary Materials

## Reduction-Triggered Paclitaxel Release Nano-Hybrid System Based on Core-Crosslinked Polymer Dots with a pH-Responsive Shell-Cleavable Colorimetric Biosensor

Seul Gi Kim <sup>1</sup>, Benny Ryplida <sup>2</sup>, Pham Thi My Phuong <sup>2</sup>, Hyun Jeong Won <sup>1</sup>, Gibaek Lee <sup>1</sup>, Suk Ho Bhang <sup>3,\*</sup>, and Sung Young Park <sup>1,2,4,\*</sup>

<sup>1</sup> Department of Chemical and Biological Engineering, Korea National University of Transportation, Chungju 380-702, Korea; k.seulgi9797@gmail.com (S.G.K.); dnjsswh@ut.ac.kr (H.J.W.); glee@ut.ac.kr (G.L.)

<sup>2</sup> Department of Green Bio Engineering, Korea National University of Transportation, Chungju 380-702, Korea; ryplida@gmail.com (B.R.); ptmp.2411@gmail.com (P.T.M.P.)

<sup>3</sup> School of Chemical Engineering, Sungkyunkwan University, Suwon 16419, Korea

<sup>4</sup> Department of IT Convergence, Korea National University of Transportation, Chungju 380-702, Korea

\* Correspondence: sukhobhang@skku.edu (S.H.B.); parkchem@ut.ac.kr (S.Y.P.); Tel.: +82-43-841-5225 (S.H.B.)

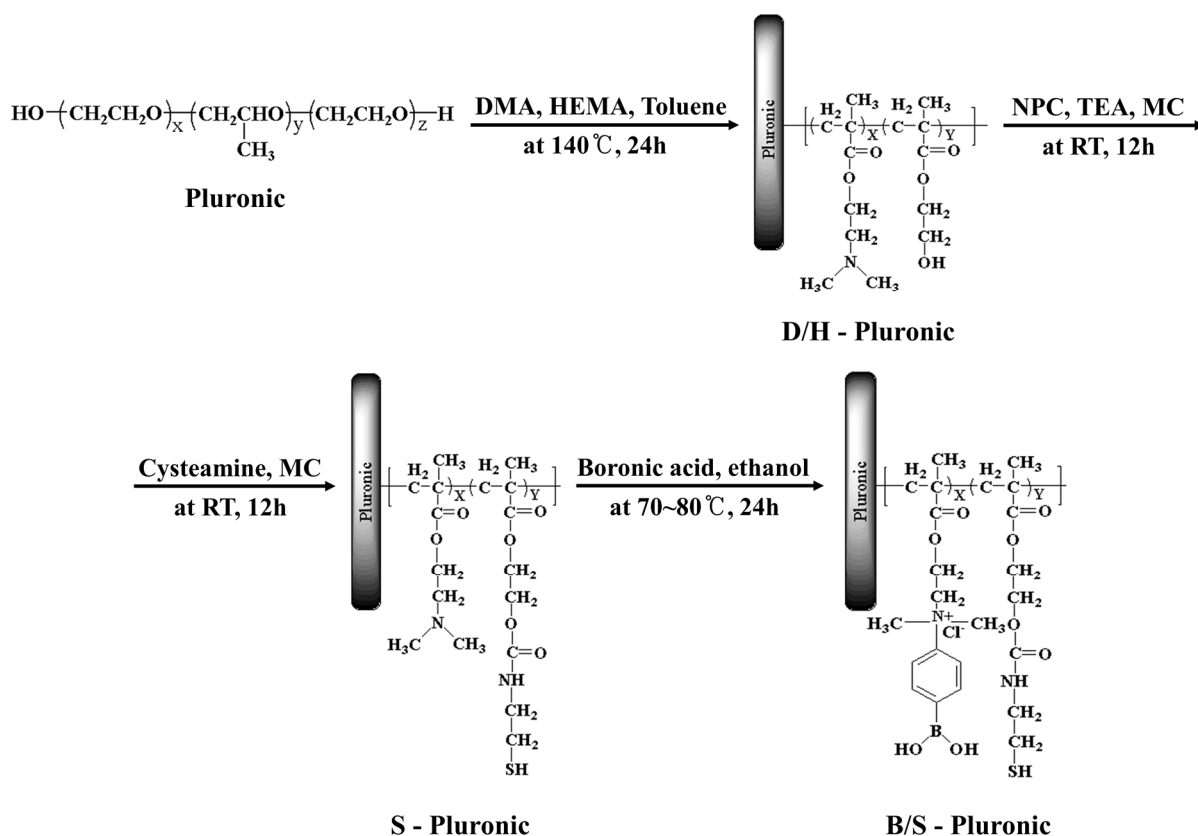

Scheme S1. Synthesis of B/S Pluronic.

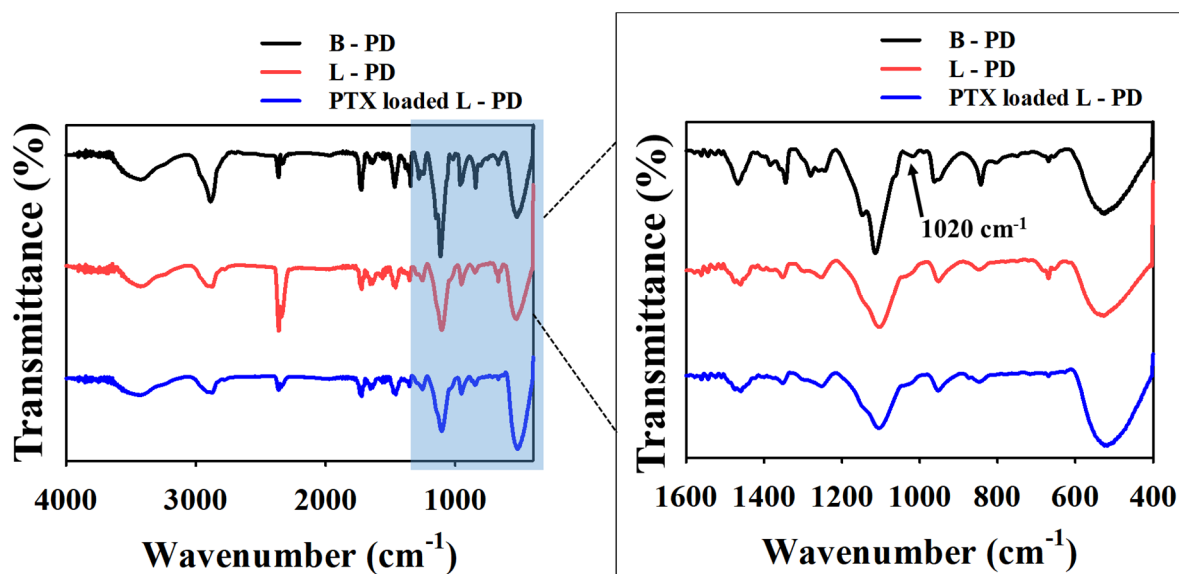

Figure S1. Fourier-transform Infrared (FT-IR) spectra of B-PD, L-PD, and PTX loaded L-PD.

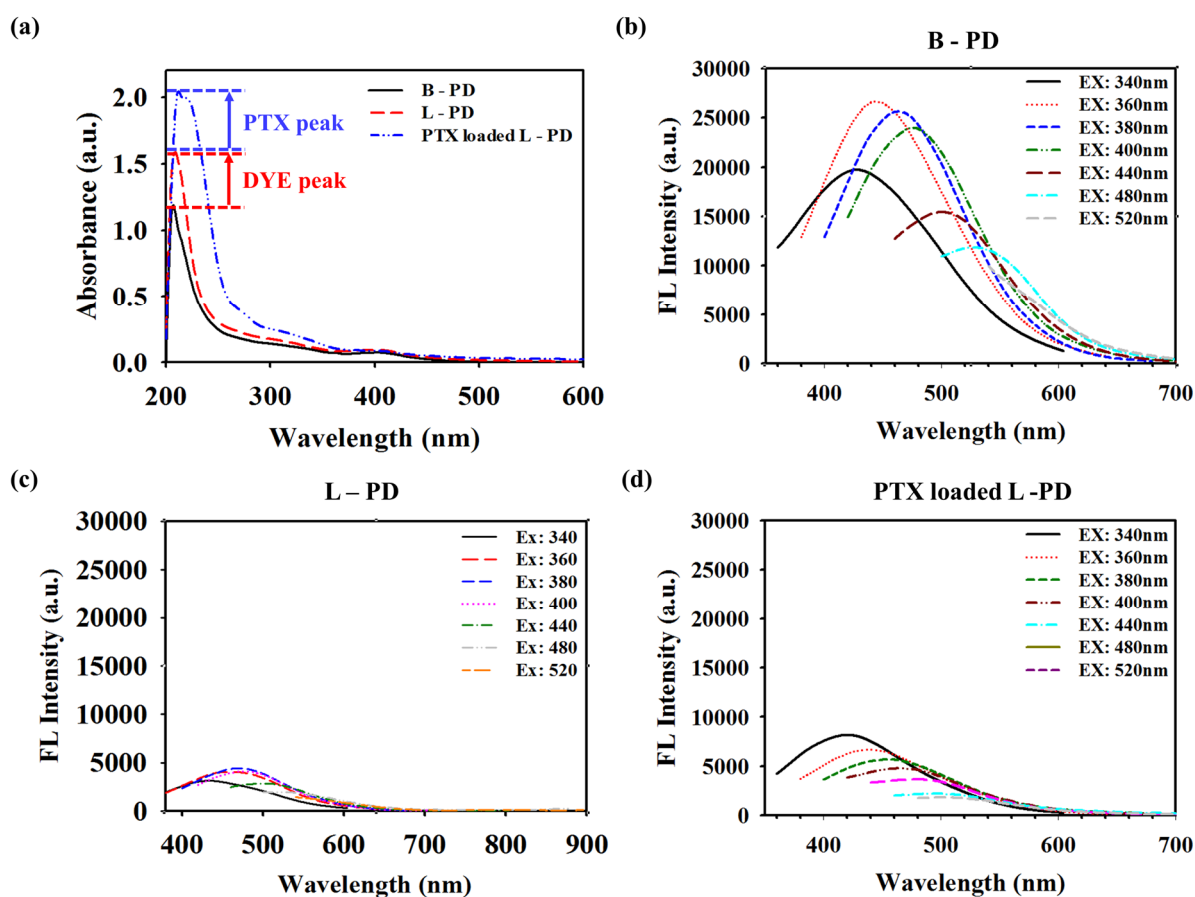

Figure S2. (a) UV-vis spectra of B-PD, L-PD, and PTX loaded L-PD (concentration 1 mg/mL). Photoluminescence spectra of (b) B-PD, (c) L-PD, and (d) PTX loaded L-PD.

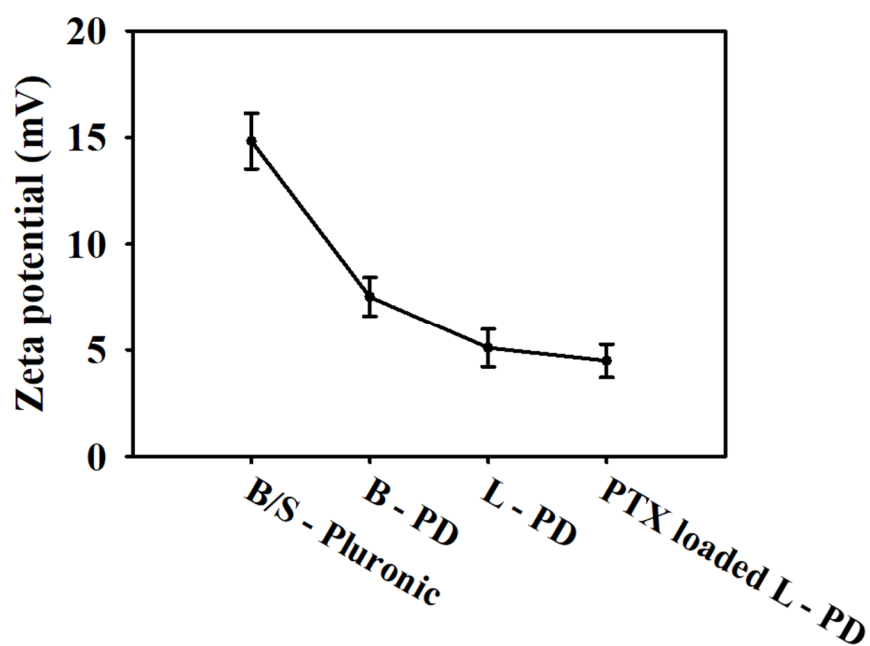

Figure S3. Zeta potentials of B/S-Pluronic, B-PD, L-PD, and PTX loaded L-PD in PBS pH 7.4 ( $n = 3$ ).

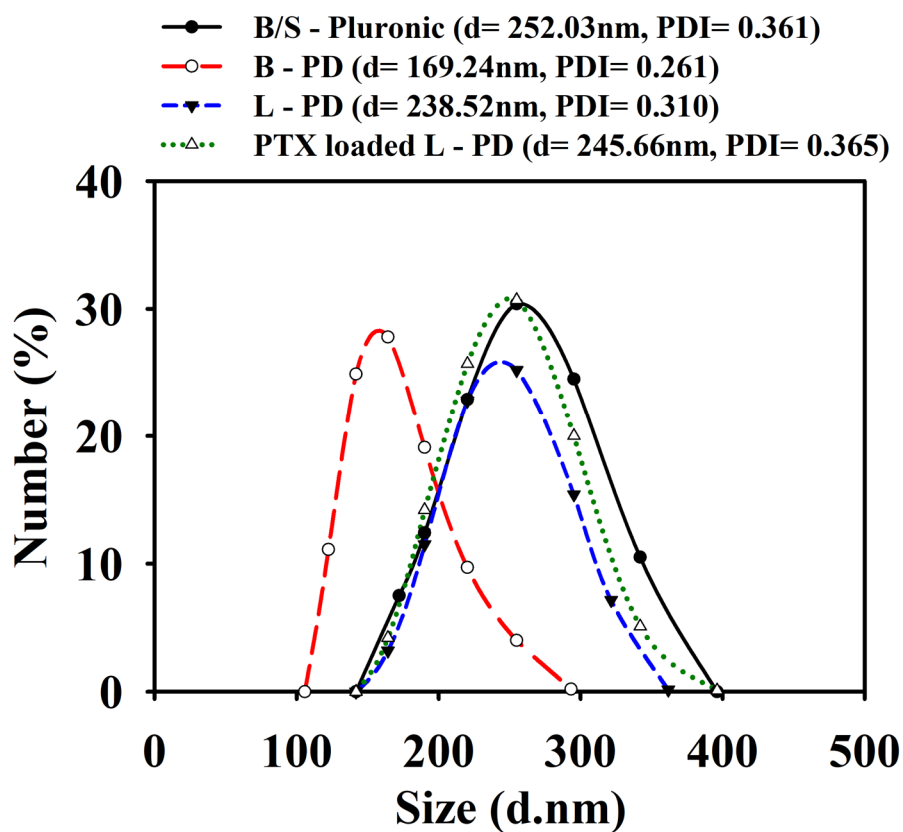

Figure S4. Average size distribution of of B/S-Pluronic, B-PD, L-PD, and PTX loaded L-PD in PBS solution pH 7.4 (Concentration: 0.5 mg/mL).

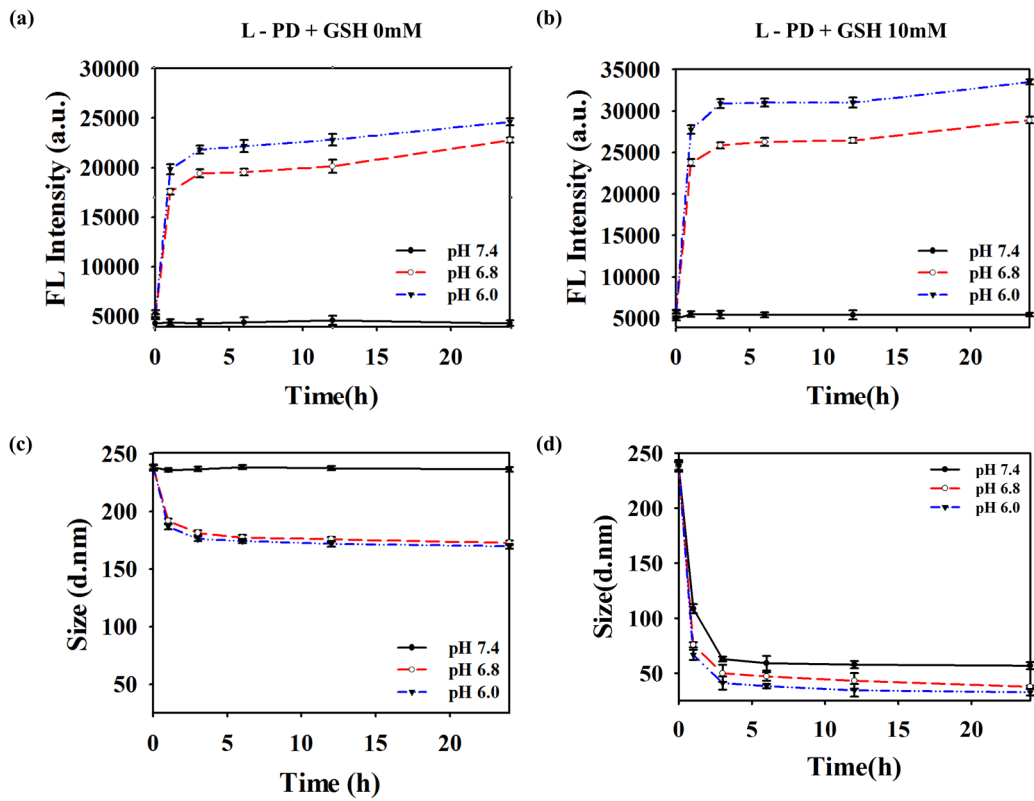

**Figure S5.** Luminescence intensity with excitation at  $\lambda = 360$  nm and (c,d) DLS measurements of L-PD at different GSH concentrations (0 and 10 mM GSH) and pH values (6.0, 6.8, and 7.4) over time ( $n = 3$ ).

**(a) PTX loaded L - PD**

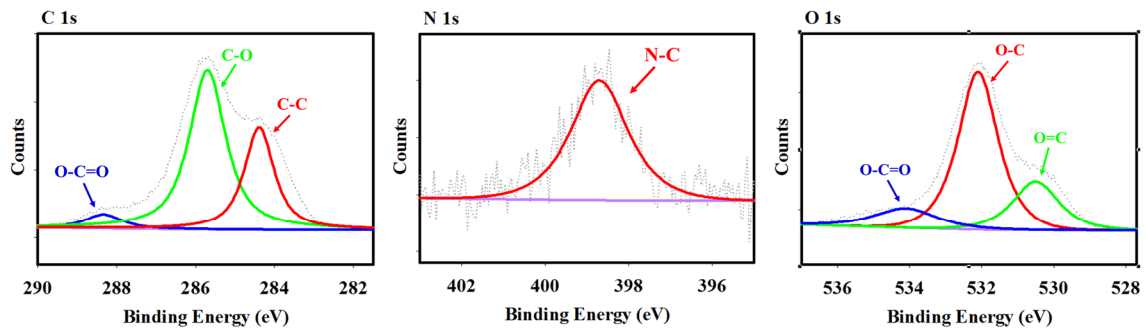

**(b) PTX loaded L - PD after GSH and pH 6.8 treatment**

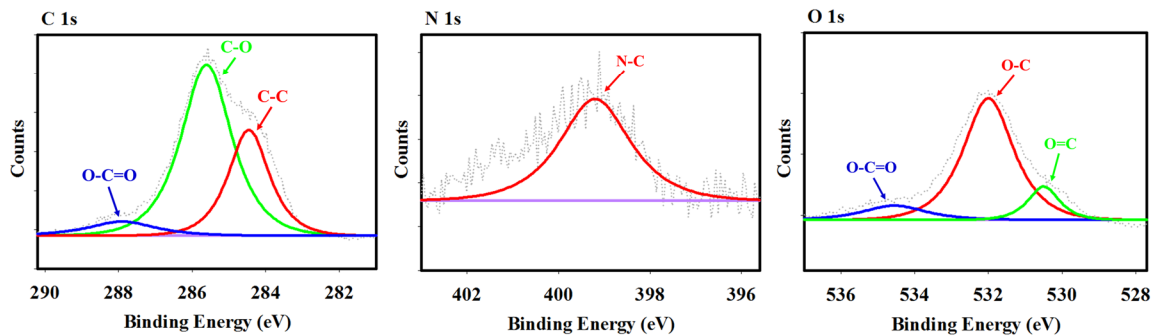

**Figure S6.** XPS narrow scan (C 1s, N 1s, and O 1s) of PTX loaded L-PD at pH 7.4 and 0 mM GSH (a) after treatment at pH 6.8 and 10 mM GSH (b).
